# Supplementary material for: A machine learning model for the early prediction of Gram-negative bloodstream infection in ICU patients
Source: Research Square preprint supplement (doi:10.21203/rs.3.rs-8240564/v1), 2025-12-08
Supplement: Supplementary file 1 [file c5a45a1427f8c74a170bded0.docx]

Supplemental Table 1 The distribution of missing data for all variables

| Variables | Missing ratio(%) |
| --- | --- |
| Temperature | 3.21 |
| SBP | 1.23 |
| DBP | 1.23 |
| Heart rate | 1.73 |
| Respiratory rate | 7.16 |
| PT | 2.47 |
| PT_activity | 2.47 |
| INR | 2.47 |
| APTT | 2.47 |
| FIB | 2.47 |
| TT | 2.47 |
| D_D | 2.97 |
| FDP | 2.97 |
| RDW_SD | 2.47 |
| PLT | 2.47 |
| PCT | 10.12 |
| PDW | 10.12 |
| MPV | 10.12 |
| GLU | 6.17 |
| K | 0.74 |
| Cl | 0.74 |
| HCO3 | 0.98 |
| Procalcitonin | 0.49 |
| CRP | 0.24 |
| PH | 34.81 |
| PO2 | 35.06 |
| PCO2 | 35.31 |
| Lac | 37.53 |
| BE | 77.78 |

Variables with a missing data ratio exceeding 15% (namely, PH, PO2, PCO2,BE, and Lac) were excluded from further analysis.


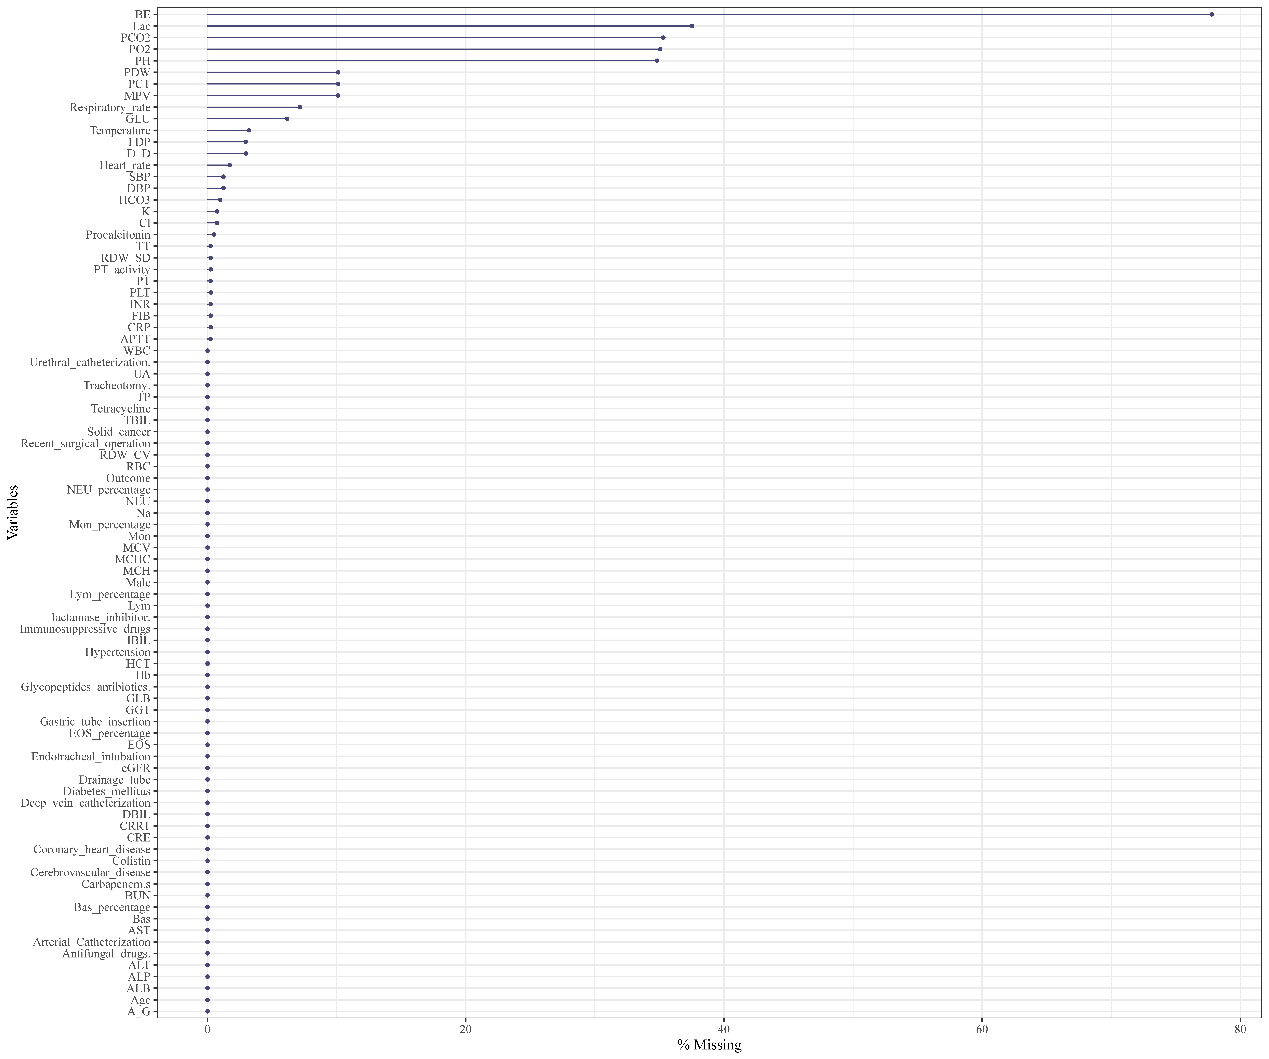


Supplemental Fig.1 The distribution of missing data for all variables

Supplemental Table 2 variables selected by LASSO regression

| Variables | Nonzero coefficient |
| --- | --- |
| Carbapenem antibiotics | 0.090107723 |
| Deep vein catheterization | 0.248735933 |
| CRRT | 0.875702311 |
| APTT | 0.016917378 |
| DBIL | 0.335135853 |
| Procalcitonin | 2.617007085 |
| CRP | 1.114877404 |

After lasso regression, seven variables had nonzero coefficients.

Supplemental Table 3 Evaluation metrics results of seven models in the training set

| Model | AUC（95%CI） | Accuracy | Sensitivity | Specificity | F1 Score | Kappa | Youden's J | PPV | NPV |
| --- | --- | --- | --- | --- | --- | --- | --- | --- | --- |
| Logistic | 0.881  (0.825-0.931) | 0.873 | 0.591 | 0.959 | 0.684 | 0.607 | 0.55 | 0.813 | 0.886 |
| Decision Tree | 0.899  (0.854-0.941) | 0.884 | 0.682 | 0.945 | 0.732 | 0.658 | 0.627 | 0.789 | 0.907 |
| Random Forest | 1 | 1 | 1 | 1 | 1 | 1 | 1 | 1 | 1 |
| XGBoost | 0.962  (0.937-0.984) | 0.898 | 0.621 | 0.982 | 0.739 | 0.678 | 0.603 | 0.911 | 0.895 |
| LightGBM | 0.998  (0.994-0.999) | 0.975 | 0.939 | 0.986 | 0.947 | 0.931 | 0.926 | 0.954 | 0.982 |
| SVM | 0.881  (0.824-0.932) | 0.856 | 0.5 | 0.963 | 0.617 | 0.534 | 0.463 | 0.805 | 0.864 |
| ANN | 0.897  (0.844-0.943) | 0.877 | 0.652 | 0.945 | 0.711 | 0.633 | 0.596 | 0.782 | 0.899 |

All seven machine learning models demonstrated excellent predictive performance in the training set. All models achieved accuracy and AUC values of 0.88 or above, among which the XGBoost model attained the highest AUC.

Supplemental Table 4. Model hyperparameters

| Models | Optimal parameter combination |
| --- | --- |
| Decision Tree | ccp_alpha': 0.0, 'max_depth': 5, 'max_features': None, 'min_samples_split': 10 |
| Random Forest | n_estimators = 150 , max_features = 2 |
| XGBoost | learning_rate': 0.2, 'max_depth': 3, 'n_estimators': 50, 'subsample': 0.8 |
| LightGBM | colsample_bytree': 0.6, 'learning_rate': 0.1, 'n_estimators': 100, 'num_leaves': 50, 'subsample': 0.6 |
| SVM | C': 0.1, 'degree': 2, 'gamma': 'scale', 'kernel': 'linear' |
| ANN | activation': 'logistic', 'hidden_layer_sizes': (100,) |

Model hyperparameters were optimized via a grid search coupled with 5-fold cross-validation. The key parameter settings for each model are summarized below; all other parameters were retained at their default values.
